# Supplementary material
Source: PubMed Central journal article supplement (PMC2846324)
Supplement: NIHMS183991-supplement-1.pdf [file NIHMS183991-supplement-1.pdf]

**Table S1**

**Immunohistochemical staining for NRP-1**

| Case   | Histology                    | WHO grade | NRP-1 immunoactivity |
|--------|------------------------------|-----------|----------------------|
| J140   | Normal                       | N         | -                    |
| J141   | Normal                       | N         | -                    |
| J142   | Normal                       | N         | -                    |
| J143   | Normal                       | N         | -                    |
| J40    | Pilocytic astrocytoma        | I         | ±                    |
| J42    | Pilocytic astrocytoma        | I         | ±                    |
| J49    | Pilocytic astrocytoma        | I         | ±                    |
| J51    | Pilocytic astrocytoma        | I         | ±                    |
| HF1155 | Diffuse astrocytoma          | II        | 1+                   |
| HF1210 | Diffuse astrocytoma          | II        | 2+                   |
| HF1367 | Diffuse astrocytoma          | II        | 2+                   |
| HF1388 | Diffuse astrocytoma          | II        | 2+                   |
| J12    | Diffuse astrocytoma          | II        | 2+                   |
| J13    | Diffuse astrocytoma          | II        | 1+                   |
| J14    | Diffuse astrocytoma          | II        | 2+                   |
| J44    | Diffuse astrocytoma          | II        | 1+                   |
| J57    | Diffuse astrocytoma          | II        | 1+                   |
| J63    | Diffuse astrocytoma          | II        | 1+                   |
| J50    | Oligoastrocytoma             | II        | 1+                   |
| HF1016 | Oligodendroglioma            | II        | 2+                   |
| HF1047 | Oligodendroglioma            | II        | 1+                   |
| HF1049 | Oligodendroglioma            | II        | ±                    |
| HF1059 | Oligodendroglioma            | II        | 1+                   |
| HF1112 | Oligodendroglioma            | II        | -                    |
| HF1113 | Oligodendroglioma            | II        | ±                    |
| HF1156 | Oligodendroglioma            | II        | -                    |
| HF1162 | Oligodendroglioma            | II        | 1+                   |
| HF1167 | Oligodendroglioma            | II        | ±                    |
| J19    | Oligodendroglioma            | II        | ±                    |
| J48    | Oligodendroglioma            | II        | 1+                   |
| J90    | Oligodendroglioma            | II        | 1+                   |
| J91    | Oligodendroglioma            | II        | 2+                   |
| HF1032 | Anaplastic astrocytoma       | III       | 1+                   |
| HF1080 | Anaplastic astrocytoma       | III       | 2+                   |
| HF1139 | Anaplastic astrocytoma       | III       | 1+                   |
| HF1295 | Anaplastic astrocytoma       | III       | 2+                   |
| HF1368 | Anaplastic astrocytoma       | III       | 1+                   |
| HF1407 | Anaplastic astrocytoma       | III       | 2+                   |
| J8     | Anaplastic astrocytoma       | III       | 2+                   |
| J9     | Anaplastic astrocytoma       | III       | 2+                   |
| J10    | Anaplastic astrocytoma       | III       | 2+                   |
| J11    | Anaplastic astrocytoma       | III       | 1+                   |
| J46    | Anaplastic astrocytoma       | III       | 1+                   |
| J60    | Anaplastic astrocytoma       | III       | 2+                   |
| J62    | Anaplastic astrocytoma       | III       | ±                    |
| J15    | Anaplastic oligodendroglioma | III       | 2+                   |
| J16    | Anaplastic oligodendroglioma | III       | 2+                   |
| J17    | Anaplastic oligodendroglioma | III       | 1+                   |
| J18    | Anaplastic oligodendroglioma | III       | 2+                   |
| J93    | Anaplastic oligodendroglioma | III       | 3+                   |
| J95    | Anaplastic oligodendroglioma | III       | 1+                   |
| J96    | Anaplastic oligodendroglioma | III       | 1+                   |
| J97    | Anaplastic oligoastrocytoma  | III       | 2+                   |
| HF1025 | Glioblastoma multiforme      | IV        | 1+                   |
| HF1058 | Glioblastoma multiforme      | IV        | 2+                   |
| HF1069 | Glioblastoma multiforme      | IV        | 3+                   |
| HF1071 | Glioblastoma multiforme      | IV        | 3+                   |
| HF1085 | Glioblastoma multiforme      | IV        | 3+                   |
| HF1087 | Glioblastoma multiforme      | IV        | 1+                   |
| HF1096 | Glioblastoma multiforme      | IV        | 2+                   |
| HF1122 | Glioblastoma multiforme      | IV        | 3+                   |
| HF1161 | Glioblastoma multiforme      | IV        | 1+                   |
| J1     | Glioblastoma multiforme      | IV        | 3+                   |
| J2     | Glioblastoma multiforme      | IV        | 2+                   |
| J5     | Glioblastoma multiforme      | IV        | 2+                   |
| J6     | Glioblastoma multiforme      | IV        | 2+                   |
| J7     | Glioblastoma multiforme      | IV        | 2+                   |
| J53    | Glioblastoma multiforme      | IV        | 2+                   |
| J55    | Glioblastoma multiforme      | IV        | 2+                   |
| J56    | Glioblastoma multiforme      | IV        | 1+                   |
| J58    | Glioblastoma multiforme      | IV        | 1+                   |
| J59    | Glioblastoma multiforme      | IV        | 1+                   |
| J64    | Glioblastoma multiforme      | IV        | ±                    |
| J65    | Glioblastoma multiforme      | IV        | 1+                   |
| J66    | Glioblastoma multiforme      | IV        | 1+                   |
| J67    | Glioblastoma multiforme      | IV        | 1+                   |
| J68    | Glioblastoma multiforme      | IV        | 1+                   |
| J70    | Glioblastoma multiforme      | IV        | ±                    |
| J72    | Glioblastoma multiforme      | IV        | ±                    |
| J74    | Glioblastoma multiforme      | IV        | 1+                   |
| J75    | Glioblastoma multiforme      | IV        | 2+                   |
| J76    | Glioblastoma multiforme      | IV        | 2+                   |
| J77    | Glioblastoma multiforme      | IV        | 2+                   |
| J79    | Glioblastoma multiforme      | IV        | 1+                   |
| J80    | Glioblastoma multiforme      | IV        | 1+                   |
| J81    | Glioblastoma multiforme      | IV        | 2+                   |
| J82    | Glioblastoma multiforme      | IV        | 2+                   |
| J83    | Glioblastoma multiforme      | IV        | 2+                   |
| J84    | Glioblastoma multiforme      | IV        | 2+                   |
| J85    | Glioblastoma multiforme      | IV        | 1+                   |
| J86    | Glioblastoma multiforme      | IV        | 1+                   |
| J87    | Glioblastoma multiforme      | IV        | 2+                   |
| J88    | Glioblastoma multiforme      | IV        | 3+                   |
| J89    | Glioblastoma multiforme      | IV        | 2+                   |
| J94    | Glioblastoma multiforme      | IV        | 1+                   |
| J98    | Glioblastoma multiforme      | IV        | 2+                   |

## **Supplementary Material:**

### **Neuropilin-1 Promotes Human Glioma Progression through Potentiating the Activity of HGF Autocrine Pathways**

B Hu<sup>1,3,\*</sup>, P Guo<sup>1,2</sup>, I Bar-Joseph<sup>1,2</sup>, Y. Imanishi<sup>1,2</sup>, MJ Jarzynka<sup>1,2</sup>, O Bogler<sup>4</sup>, T Mikkelsen<sup>5</sup> T Hirose<sup>6</sup>, R Nishikawa<sup>7</sup> and SY Cheng<sup>1,2,\*</sup>

University of Pittsburgh<sup>1</sup> Cancer Institute & Department of<sup>2</sup> Pathology or<sup>3</sup> Medicine, Research Pavilion at Hillman Cancer Center, Room 2.19, 5117 Centre Avenue; Pittsburgh, PA 15213;

<sup>4</sup>Department of Neurosurgery & Brain Tumor Center, M.D. Anderson Cancer Center, University of Texas, 1515 Holcombe Blvd, Unit 64, Houston, TX 77030; Hermelin Brain Tumor Center,

Henry Ford Hospital, 2799 West Grant Blvd, Detroit, MI 48202; Department of<sup>6</sup> Pathology and

<sup>7</sup>Neurosurgery, Saitama Medical University, Saitama, 350-0495, Japan

The abbreviations used are: NRP1, neuropilin-1; semaphorin 3A, Sema 3A; HGF/SF, hepatocyte growth factor/scatter factor; FGF, fibroblast growth factor; VEGF, vascular endothelial growth factor; VEGF-R, VEGF receptor; Akt, v-Akt murine thymoma viral oncogene homolog; Bad, Bcl-2 antagonist of cell death; PTEN, phosphatase and tensin homologue; CM, conditioned media; MVD, microvascular density; IHC, Immunohistochemistry; NRP1 or LacZ, U87MG cells that stably overexpress NRP1 or LacZ, respectively.

## **Results**

**NRP1 expression significantly correlates with the malignancy of human gliomas.**

We determined whether there is a link between up-regulation of NRP1 and human glioma progression using IHC analysis of 92 primary glioma specimens and 4 normal brain biopsies. As shown in Figure 3B and Table S1, no or weak immunoactivity for the anti-NRP1 antibodies were found in the 4 normal brain tissues (-) and the 4 WHO grade I gliomas (P.A., ±). In WHO grade II and III glioma specimens, 29.2 % of the grade II gliomas (7 out of 24) and 47.6% of the grade III gliomas (10 out of 21) were strongly positive for NRP1 expression ( $\geq 2+$ ) whereas 45.8 % of grade II (11 out of 24) and 47.6 % of grade III tumors (10 out of 21) expressed NRP1 at moderate levels (1+). In a total of 43 WHO grade IV glioma specimens examined, 55.8% (24 out of 43 biopsies) tumors showed high levels of NRP1 expression (2+ or 3+) and 37.2% tumors expressed NRP1 at moderate levels (16 out of 43). We then performed a Kruskal-Wallis test on these data between normal and grade I tumors versus grade III and IV and found a significant difference ( $p < 0.0001$ ). The difference between each group was then examined by a Scheffe's post-hoc test and statistical significance was found again among these groups (Figure 1B). Together, these data show that there is a significant difference in IHC staining for NRP1 among the 3 groups as well as a correlation between NRP1 expression and the malignancy of human glioma.

## **Materials and Methods**

### **Antibodies and Reagents.**

The following reagents were used in this study: a rabbit anti-NRP1 antibody, NP1ECD1A, 1:100 for IHC (Guo et al., 2001); goat polyclonal anti-NRP1 antibodies, C-19 and H-286, 1:100 dilution for immunohistochemical (IHC) staining and 1:500 dilution for immunoblot (IB) analyses, rabbit anti-c-Met (C-12), mouse anti-Bad (C-17) and goat anti-Sema 3A antibodies

(IB), Santa Cruz Biotechnology, Inc. (Santa Cruz, CA); a rat monoclonal anti-mouse CD31 antibody (MEC 13.3), 1:1000 for IHC, and its isotype control IgG<sub>2a.κ</sub>, BD PharMingen, Inc. (San Diego, CA); a rabbit polyclonal anti-von Willebrand Factor (vWF) antibody, 1:1000 dilution for IHC, DAKO (Carpinteria, CA); a mouse monoclonal anti-BrdUrd antibody (ready to use), Amersham (Piscataway, NJ); a rabbit anti-ERK1/2 antibody and a phospho-specific polyclonal antibody against activated ERK1/2 (E10 to pT202/pY204), a rabbit anti-p-Bad (Ser-112) antibody and a rabbit anti-p-Bad (Ser-136) antibody, Cell Signaling (Danvers, MA); and a polyclonal anti-Met (pY<sup>1230/1234/1235</sup>) antibody, Biosource/Invitrogen (Carlsbad, CA). The secondary and tertiary antibodies were from Vector Laboratories (Burlingame, CA), Jackson ImmunoResearch Laboratories (West Grove, PA) and Molecular Probes/Invitrogen (Carlsbad, CA). A 3,3'-diaminobenzidine elite kit was from Dako Co. (Carpinteria, CA). Aquablock was from East Coast Biologicals, Inc., (North Berwick, ME). U0126 was from CalBiochem. (San Diego, CA). All other chemicals and reagents were from Sigma Chemical Co. (St. Louis, MO), Invitrogen/Life Sciences (Carlsbad, CA) and Fisher Scientific (Hanover Park, IL).

**Primary human glioma specimens, IHC and statistical analyses.** Of the 96 clinical tissue specimens that were investigated, there were 4 pilocytic astrocytomas (P.A., WHO grade I), 10 diffuse astrocytomas (D.A., WHO grade II), 1 oligoastrocytoma (O.A., WHO grade II), 13 oligodendrogliomas (O.D., WHO grade II), 13 anaplastic astrocytomas (A.A., WHO grade III), 7 anaplastic oligodendrogliomas (A.O.D., WHO grade III), 1 anaplastic oligoastrocytoma (A.O.A., WHO grade III) and 43 glioblastoma multiforme (GBM, WHO grade IV). Four normal human brain biopsies were also included as normal controls. The tumor samples were surgical specimens obtained at the Department of Neurosurgery, Saitama Medical School, Saitama, Japan

and the Department of Neurosurgery, Henry Ford Hospital, Detroit, MI, USA. The normal brain samples were from autopsied patients who did not have any brain lesions. Analyses of histopathology of the clinical specimens, IHC staining and statistics were performed using three well-characterized anti-NRP1 antibodies (Ding et al., 2000) and isotype matched IgGs as negative controls that all showed no staining as previously described (Guo et al., 2005). The specificity of each of these antibodies for detecting NRP1 expression was verified by IB analyses on U87MG or COS-7 cells that were transfected by human NRP1 cDNA (Cackowski et al., 2004). All three anti-NRP1 antibodies produced similar NRP1 expression profiles for IHC staining on these primary glioma specimens when using DAB as a chromogen. The intensities of IHC staining were defined as no stain (-), the reaction was indistinguishable from the background; weakest ( $\pm$ ), 5 to 10% of tumor cells were stained; low (1+), 10% to 25% of tumor cells were positive; medium, (2+), 25% to 40 % of tumor cells were positive; and high (3+), more than 40% of tumor cells were positively stained.

#### **Human glioma xenograft models, *in vivo* BrdUrd labeling, IHC and Quantitative Data**

**Analyses.** Subcutaneous and intracerebral tumor implantation, measurements of U87MG glioma growth kinetics, preparation of frozen and paraffin-embedded tissue samples, BrdUrd incorporation, IHC and immunofluorescent staining and statistical analyses were performed as previously described (Guo et al., 2003b; Guo et al., 2001).

**Immunoprecipitation (IP) and immunoblot (IB) Analyses.** Cells and tumor tissues were lysed on ice with a lysis buffer containing 20 mM Tris-HCl (pH 7.0), 100 mM NaCl, 2 mM EDTA, 1 mM  $\text{Na}_3\text{VO}_4$ , 5 mM NaF, 10 mM  $\text{Na}_4\text{P}_2\text{O}_7$ , 0.5% sodium deoxycholate, 1% Triton X-

100, 10% glycerol and protease inhibitor cocktail. Total lysates of various cells or tissues were then subjected to IP analyses using 1 mg of total protein or IB analyses using 30 µg of total protein as previously described except the indicated antibodies against Bad, c-Met or NRP1 were used (Hu et al., 2003). The IB analyses of frozen primary human glioma tissues were performed using anti-NRP1, antic-Met or anti-phosphorylated-c-Met antibodies as previously described (Nishikawa et al., 1998).

**Generation of U87MG cell lines that stably express NRP1 or LacZ.** Full-length NRP1 cDNA was assembled, validated by sequencing and cloned into a retroviral vector, pLNCX2 as previously described (Cackowski et al., 2004). U87MG cell lines that stably express NRP1 or LacZ encoded by the pLNCX2 vector were generated as previously reported (Nishikawa et al., 1994).

**Cell Survival and Proliferation Assays.** U87MG parental and NRP1-expressing cells were seeded and cultured in 6-well plates in triplicate in serum-free DMEM at 37°C in 5% CO<sub>2</sub>. At 24 hr intervals, cells were trypsinized, stained with trypan blue dye and counted. For neutralizing antibody blocking, the indicated antibodies were included in the serum-free medium for 48 hr. For siRNA inhibition, cells were transiently transfected with gene-specific or control siRNA for 24 hr and then cultured in serum-containing medium for an addition 48 hr.

NRP1-enhanced glioma cell proliferation was assessed as previously described except various concentrations of rhHGF were used in the assays (Guo et al., 2003a). In the experiments for siRNA inhibition of NRP1, the cells were seeded in 96-well plates 48 hr after siRNA transfection.

## References

- Cackowski FC, Xu L, Hu B and Cheng SY. (2004). Identification of two novel alternatively spliced Neuropilin-1 isoforms. *Genomics*, 84, 82-94.
- Ding H, Wu X, Roncari L, Lau N, Shannon P, Nagy A, et al. (2000). Expression and regulation of neuropilin-1 in human astrocytomas. *Int J Cancer*, 88, 584-92.
- Guo P, Fang Q, Tao HQ, Schafer CA, Fenton BM, Ding I, et al. (2003a). Overexpression of vascular endothelial growth factor by MCF-7 breast cancer cells promotes estrogen-independent tumor growth in vivo. *Cancer Res*, 63, 4684-91.
- Guo P, Hu B, Gu W, Xu L, Wang D, Huang HJ, et al. (2003b). Platelet-derived growth factor-B enhances glioma angiogenesis by stimulating vascular endothelial growth factor expression in tumor endothelia and by promoting pericyte recruitment. *Am J Pathol*, 162, 1083-93.
- Guo P, Imanishi Y, Cackowski FC, Jarzynka MJ, Tao HQ, Nishikawa R, et al. (2005). Up-regulation of angiopoietin-2, matrix metalloprotease-2, membrane type 1 metalloprotease, and laminin 5 gamma 2 correlates with the invasiveness of human glioma. *Am J Pathol*, 166, 877-90.
- Guo P, Xu L, Pan S, Brekken RA, Yang ST, Whitaker GB, et al. (2001). Vascular endothelial growth factor isoforms display distinct activities in promoting tumor angiogenesis at different anatomic sites. *Cancer Res*, 61, 8569-77.
- Hu B, Guo P, Fang Q, Tao HQ, Wang D, Nagane M, et al. (2003). Angiopoietin-2 induces human glioma invasion through the activation of matrix metalloprotease-2. *Proc Natl Acad Sci U S A*, 100, 8904-9.
- Nishikawa R, Cheng SY, Nagashima R, Huang HJ, Cavenee WK and Matsutani M. (1998). Expression of vascular endothelial growth factor in human brain tumors. *Acta Neuropathol (Berl)*, 96, 453-62.
- Nishikawa R, Ji XD, Harmon RC, Lazar CS, Gill GN, Cavenee WK, et al. (1994). A mutant epidermal growth factor receptor common in human glioma confers enhanced tumorigenicity. *Proc Natl Acad Sci U S A*, 91, 7727-31.
